# Supplementary material for: Transcriptome-wide association studies identify candidate genes for carcass and meat traits in meat rabbits
Source: Front Vet Sci. 2024 Dec 6;11:1453196. doi: 10.3389/fvets.2024.1453196 (PMC11660804; doi:10.3389/fvets.2024.1453196)
Supplement: Supplementary file 1 [file Data_Sheet_1.xlsx]

## Sheet: Figure S1
Supplementary Figure S1. Quantile-Quantile plots for association analyses of carcass traits and meat traits. CW: carcass weight; DP: dressing out percentage; LW: cut weight of hind legs; RLW: weight ratio of cut hind legs to carcass; WF: weight of visceral and interscapular fat; DL: drip loss; CL: cooking loss; CI: confidence interval.

## Sheet: Table S1
Supplementary Table S1: The top 20 genes with the lowest P values revealed by association analyses for every traits and their expression levels in all samples
Gene information							The gene expression levels in each sample
Trait	Gene name	Chromosome	Start (bp)	End (bp)	P values	Description	A0001	A0002	A0003	A0004	A0005	A0006	A0007	A0008	A0009	A0014	A0015	A0016	A0017	A0018	C0001	C0002	C0003	C0004	C0005	C0006	C0007	C0008	C0009	C0010	C0011	C0012	D0001	D0003	D0004	D0005	D0006	D0008	D0009	D0010	D0011	D0012	D0013	D0014	E0001	E0002	E0003	E0004	E0005
CW	PCSK6	17	85347007	85515126	3.11e-05	proprotein convertase subtilisin/kexin type 6	12.1874	12.263	23.1437	13.8674	12.8489	11.8942	13.2979	6.36367	13.3288	35.6461	22.2401	20.9935	22.1371	22.9114	16.5621	12.9526	15.0969	13.05	18.0312	15.889	8.40723	12.5205	6.82268	13.996	9.60827	9.35655	24.3777	13.3258	14.9558	14.5455	12.4076	11.6511	13.1978	21.1366	13.245	11.1205	22.9594	9.35944	16.7183	9.94777	15.3058	12.1277	13.3092
CW	RDH5	4	46872687	46880703	5.03e-05	retinol dehydrogenase 5	1.74106	3.95688	3.64261	0	1.60611	1.5859	2.08334	1.06061	0.83305	1.13162	2.99006	1.54364	1.24133	2.40814	0.871687	1.33993	1.91819	1.22344	2.14657	0.247162	0.64671	2.24166	0.257746	2.94653	1.32528	1.38789	2.38733	1.90368	1.94426	1.47948	0.954432	0.416112	0.869504	0	2.37464	1.11205	1.85156	0	1.46606	0.663185	0.891729	3.3244	0.782894
CW	NDUFB5	14	76176758	76196395	0.000243	NADH:ubiquinone oxidoreductase subunit B5	678.934	656.253	766.8	621.738	468.501	343.299	736.494	743.181	450.03	805.324	685.008	710.691	576.73	575.432	500.854	577.347	577.073	701.618	623.681	755.229	749.323	762.526	776.694	758.968	822.779	851.906	709.298	554.58	600.303	601.434	619.254	1127.86	818.025	535.92	825.825	864.694	655.743	732.402	667.471	590.434	631.025	556.702	666.486
CW	KIAA0408	12	38832741	38863007	0.000349	KIAA0408 ortholog	8.04369	5.85356	9.39834	9.66092	5.06727	35.5875	29.8206	11.0092	43.8018	3.03275	2.95917	4.97051	5.42267	7.77038	24.1283	18.5535	19.4306	10.8315	13.1112	4.88144	6.86806	5.9937	12.0231	3.25592	5.95713	9.38774	19.3172	12.3739	24.8184	30.8197	7.80725	7.4484	4.59595	6.41027	2.72468	3.98113	7.9321	11.3504	3.01572	9.04584	7.22034	4.30175	6.16138
CW	SMARCC1	9	100406463	100572686	0.00039	SWI/SNF related	41.7854	53.1399	31.1936	41.6021	40.9557	42.8192	43.2183	19.091	30.8228	58.8443	35.8313	51.8662	50.0889	59.4722	40.9693	33.0515	31.0818	53.0157	42.0727	46.7841	41.3894	38.9557	38.6618	40.5148	49.6979	41.3248	38.6681	40.9291	41.544	44.8831	40.0861	37.4501	34.9354	43.6592	41.6271	45.5939	37.7719	45.0955	37.2946	56.3707	37.2663	57.7847	35.2302
CW	SAMD4A	17	74106025	74329721	0.000499	sterile alpha motif domain containing 4A	14.3637	15.1244	18.6156	7.85817	10.8412	12.6872	16.0683	11.6667	7.91397	16.9743	20.3868	22.2284	19.8722	20.2303	12.6395	15.1858	11.5447	18.3516	11.1622	7.06176	26.1917	10.5932	11.3711	10.6812	12.5901	22.6117	10.5076	16.1813	9.97056	15.7922	18.1342	7.49001	6.59892	11.088	8.51463	10.0084	7.40626	11.912	32.4721	21.2219	25.9533	27.1089	20.7467
CW	UBE2L3	21	5946470	5999848	0.000606	ubiquitin conjugating enzyme E2 L3	86.8091	93.9022	107.226	66.2397	48.9702	70.7786	57.8349	95.7733	97.825	30.7688	42.837	32.0521	29.1822	23.3404	66.2918	86.9969	82.7486	86.7255	76.5724	52.7955	47.7983	54.0048	49.5706	58.3782	47.0739	59.2582	48.5705	65.5246	52.9354	80.5153	88.0654	74.3592	76.9434	37.9627	68.4387	42.1799	64.8047	70.902	40.3554	54.4143	56.7246	48.9244	67.2819
CW	VPS37A	2	69029340	69078034	0.000634	VPS37A subunit of ESCRT-I	56.654	32.9794	53.0896	33.7901	25.5451	38.6483	25.0001	23.9486	29.7565	12.8552	4.70132	10.3671	18.5438	9.61792	36.8637	27.5935	31.0995	30.4392	27.768	18.7666	18.0626	12.4316	19.6342	11.4473	13.4251	25.8865	25.3948	25.0239	26.1561	34.0197	29.4538	14.3309	12.1498	31.4346	17.5118	7.00589	16.4789	19.7825	23.7014	23.8415	12.4576	24.9259	19.6115
CW	RPL14	9	112562380	112566064	0.000721	ribosomal protein L14	672.335	1102.85	1083.51	1380.24	1310.95	1562.51	1643.24	1902.81	1595.92	881.997	1359.33	1301.34	1270.3	1121.25	1430.97	1656.34	1354.25	1037.48	1494.39	1556.26	1000.96	1409.18	1291.18	982.176	981.998	856.608	2155.85	883.288	1394.26	1287.25	1404.68	1772.3	1818.23	1229.59	1588.4	1359.28	1453.28	1214.97	856.015	922.298	790.311	1075.41	760.456
CW	FAM104A	19	54243372	54267173	0.000824	family with sequence similarity 104 member A	3.48211	6.54029	12.075	8.31117	7.22748	8.7145	7.75712	2.12122	5.83135	4.71886	4.32447	9.268	6.53333	6.17146	8.4205	9.82612	7.10441	6.52501	5.15176	3.53088	1.94013	4.78403	1.51615	4.4198	6.62639	3.89856	1.67281	4.7592	8.30049	2.49351	4.77216	1.66445	6.72313	6.23702	1.89214	3.33614	4.44375	2.55257	5.7871	6.63185	7.99229	11.8922	8.61184
CW	WDFY1	7	8219462	8283191	0.00136	WD repeat and FYVE domain containing 1	16.8883	14.4867	12.0146	22.6315	19.2893	17.1277	28.9673	37.2275	40.153	9.6301	19.3118	15.5166	12.2663	11.9432	23.6053	24.9226	25.5759	9.65701	18.1256	30.0301	26.528	24.7949	29.0646	30.4966	18.1033	32.0852	14.6098	17.6471	27.0784	25.974	33.5292	29.985	26.6286	19.4318	25.7993	24.9098	20.1228	18.5317	20.9364	14.285	18.4734	13.4546	9.58263
CW	CDH8	5	17294490	17712444	0.00146	cadherin 8	35.6917	31.0664	32.1999	22.1878	24.0916	3.96474	16.6224	20.1516	12.4957	7.92135	3.70669	4.32219	15.2444	7.79963	24.4072	27.6918	25.7535	34.2563	28.3347	9.70992	7.76052	8.88462	15.1615	6.6297	18.5539	18.7131	35.3056	29.507	19.9411	24.9351	32.4507	19.1411	21.7376	12.474	18.9214	10.0084	19.2563	22.9732	10.9312	11.9373	6.65469	6.42052	10.1776
CW	LOC103351068	16	4523369	4531242	0.00157	uncharacterized LOC103351068	1.74106	0.817536	3.01874	3.69796	0.803053	6.34359	3.32448	0	3.3322	3.39486	2.47112	3.70473	2.72222	5.84972	4.35844	3.57313	2.66415	5.70938	1.71725	0.88272	7.11381	1.36687	6.82268	6.6297	3.97584	2.33914	2.52183	7.61472	5.81616	4.98701	2.86329	2.49667	4.65806	2.07901	4.73035	1.11205	5.18438	0.850858	3.85807	1.32637	1.99641	3.56696	0.782894
CW	IPO13	13	122817517	122837411	0.0016	importin 13	21.6762	34.1648	32.8741	31.7562	25.9306	58.7813	33.0564	66.3307	88.6448	23.6848	25.2178	18.6842	18.7779	14.5853	24.2503	24.0472	42.1558	31.6952	32.8081	36.4563	31.9475	26.9409	29.853	28.7876	22.2647	21.0289	17.7537	21.4354	27.9259	24.0125	55.5956	33.8798	37.5517	28.1913	44.4842	37.4871	37.1276	39.8202	29.167	39.8641	31.2837	26.4526	34.4395
CW	GPR161	13	25204949	25261240	0.00168	G protein-coupled receptor 161	6.085	0.809361	0	0.92449	2.40916	3.97267	1.09708	3.18184	1.65777	4.53214	1.85334	3.70473	3.80567	3.40746	0.86297	3.5642	0.87917	0.80747	4.30172	3.52205	0	2.0503	2.28181	1.48063	1.98792	2.33914	3.35403	3.79784	2.49264	1.67065	1.91841	3.32057	1.56045	2.07901	0.936609	3.33614	1.48866	0.84235	1.29245	5.31211	3.334	2.14017	2.34868
CW	LAYN	1	118791767	118813641	0.00182	layilin	7.53007	4.08768	4.02499	3.38363	5.34834	11.8942	5.16403	4.24245	0.83305	7.58186	3.49664	4.57534	6.57689	11.6946	12.9358	8.03955	8.22335	0.611719	0	9.78936	12.2875	9.11699	7.8385	12.8911	9.17093	3.43853	5.11932	4.48316	6.64704	12.6005	9.69702	11.9341	5.42664	2.53639	10.1324	4.07009	10.6206	8.79787	4.77114	6.73796	14.3076	2.61101	1.37006
CW	DCN	4	77888178	77928107	0.00202	decorin	1057.89	1110.19	886.292	985.488	844.989	1141.61	920.039	1054	1163.5	927.93	1611.58	923.818	1223.81	1367.11	656.468	946.318	707.732	877.98	1089.23	1331.87	1928.03	945.133	1220.06	1540.98	1205.09	1476.23	1164.35	835.249	812.16	871.347	772.049	871.58	1074.76	1464.82	1114.33	1105.89	1210.35	767.151	882.558	748.557	903.321	705.009	821.734
CW	YAP1	1	128478004	128625793	0.00242	Yes1 associated transcriptional regulator	11.3169	9.81044	8.04997	10.1786	15.258	15.859	11.0816	8.4849	9.16355	10.1846	4.94225	4.93964	3.81111	8.77459	11.3232	5.3597	15.0969	14.6731	11.1622	7.94448	7.76052	2.73373	6.05702	5.89307	14.5781	8.57684	13.4498	10.4702	9.13968	9.14286	5.72659	9.98668	6.21075	12.474	9.4607	5.56023	5.92501	5.10515	16.7183	17.906	18.6331	17.8348	16.4486
CW	B2M	17	28552727	28559599	0.00262	beta-2-microglobulin	1.84552	527.777	83.0254	846.861	260.92	306.601	286.171	212.324	586.45	1052.98	591.192	614.701	1280.99	954.09	3.03347	378.082	495.639	1318.09	257.03	167.046	250.109	359.144	515.484	188.446	212.74	3.32937	429.972	3.37903	942.152	723.042	864.4	1887.72	1290.25	2356.42	1755.64	2337.09	2396.61	1782.39	246.241	136.311	614.548	129.716	215.852
CW	KCNH8	14	6393227	6845407	0.00272	potassium voltage-gated channel subfamily H member 8	52.3275	44.5803	47.686	49.9964	54.961	69.827	64.2511	55.417	35.0214	69.3967	44.4308	44.8519	58.6693	46.2177	61.0966	53.7399	53.3541	73.1861	62.9116	59.6277	58.6501	66.8192	60.5096	70.1201	70.4916	69.8389	54.8666	74.7194	57.4886	64.3325	60.8259	49.4591	61.6805	54.6918	48.0509	51.7991	55.7765	68.4771	94.6512	96.6658	93.179	85.7711	88.5688
DP	FABP3	13	134897497	134905396	0.000182	fatty acid binding protein 3	1137.12	1973.57	1324.67	1615.56	891.638	935.37	1396.9	2284.59	1344.23	2386.85	1665.24	1570.86	1119.04	1894.48	712.587	1004.92	998.791	1498.92	1222.92	1794.28	7636.49	2038.83	1957.72	1598.41	2074.64	1740.42	982.32	946.405	1257.47	1532.8	1335.34	1819.5	1786.53	1145.19	1805.6	1801.9	1418.75	1252.69	1507.75	1046.01	1825.97	1179.76	1176.94
DP	SALL2	17	42700489	42717564	0.00037	spalt like transcription factor 2	5.22317	3.27015	6.03748	4.62245	6.42443	0.792948	1.10816	5.30306	3.3322	3.39486	3.08891	3.70473	3.26667	0.487477	0	0	2.66415	7.34063	3.43451	1.76544	2.58684	1.36687	3.79038	5.15643	3.97584	1.55943	3.36244	4.7592	0.83088	4.98701	3.81773	2.49667	0	2.07901	0.94607	2.22409	3.70313	5.10515	5.7871	5.30548	3.32735	3.56696	2.34868
DP	AAMP	7	14014788	14041341	0.000768	angio associated migratory cell protein	111.079	83.8874	81.4758	90.8404	85.8223	121.725	150.034	170.748	183.679	80.3734	60.975	78.4106	59.7038	42.0059	72.2629	92.696	85.8124	60.234	91.2892	92.8268	67.8722	95.8104	76.3458	82.3409	96.9971	78.4235	62.6507	71.3689	64.0692	84.5963	95.2236	75.7324	99.3719	77.0965	77.5494	65.2326	71.7444	103.286	83.5143	112.635	87.5425	97.2495	73.2319
DP	DOK4	5	13628307	13635059	0.000953	docking protein 4	6.0937	2.45261	7.04372	8.32041	32.1221	7.13653	5.5408	8.4849	8.3305	57.1469	24.7112	27.7855	35.3889	49.2352	19.1771	16.9724	19.5371	23.6532	25.7588	25.5989	33.6289	23.4076	24.2584	39.7782	29.8188	31.1885	11.7685	20.9405	14.9558	14.961	10.4987	9.15446	10.8688	22.1761	12.2989	8.89637	14.8125	15.3154	11.5742	11.2741	12.6439	13.5544	7.82894
DP	PALB2	6	14339369	14365741	0.000973	partner and localizer of BRCA2	4.05666	2.99218	3.3508	6.00919	3.29252	7.79468	2.21632	3.00153	3.3322	2.45562	1.54445	1.95733	3.08156	2.27652	5.66597	7.14627	4.74219	5.70938	1.71725	5.38459	9.05394	2.27583	5.05636	3.68317	2.65056	6.49501	6.58198	5.80622	5.67491	4.98701	3.34051	6.65779	3.36933	4.15802	3.31125	2.95804	3.82163	3.965	4.07026	6.08141	3.55361	4.9438	6.0048
DP	CBLB	14	115344063	115578334	0.00165	Cbl proto-oncogene B	5.22317	5.72275	4.04511	9.25415	8.84965	4.75769	4.44372	3.18184	9.9966	3.39486	7.40102	6.77966	8.71111	7.30728	13.0753	9.82612	8.00134	12.2262	12.0208	8.81837	9.71358	6.15089	4.53329	10.3055	5.9505	5.48138	17.6696	9.53743	11.624	9.15948	8.58988	0.832224	7.7712	3.45808	6.62249	4.45931	4.43635	7.67474	7.71613	7.29503	3.32735	7.85444	4.70519
DP	RDH5	4	46872687	46880703	0.0018	retinol dehydrogenase 5	1.74106	3.95688	3.64261	0	1.60611	1.5859	2.08334	1.06061	0.83305	1.13162	2.99006	1.54364	1.24133	2.40814	0.871687	1.33993	1.91819	1.22344	2.14657	0.247162	0.64671	2.24166	0.257746	2.94653	1.32528	1.38789	2.38733	1.90368	1.94426	1.47948	0.954432	0.416112	0.869504	0	2.37464	1.11205	1.85156	0	1.46606	0.663185	0.891729	3.3244	0.782894
DP	OCA2	17	78845061	79219074	0.00198	OCA2 melanosomal transmembrane protein	4.35264	1.63507	1.00625	8.62549	2.40916	1.18942	3.32448	1.06061	6.6644	1.13162	0.617781	3.29104	3.81111	0.974954	3.48675	0.893283	3.5522	1.63125	2.57588	3.53088	0	5.46746	2.27423	0	2.65056	5.45799	0.84061	3.80736	2.49264	4.15584	3.81773	3.32889	3.88172	9.00903	0.94607	6.95029	2.22188	1.70172	2.57204	7.04966	1.33094	4.99374	4.26677
DP	LOC100343655	12	144912250	144912910	0.00205	ubiquitin-conjugating enzyme E2 N	43.5264	36.3804	57.356	56.8561	39.3496	19.4272	43.2183	57.8033	33.322	54.6007	31.5068	45.6917	36.4778	28.5174	29.6374	31.7116	26.6415	42.8204	47.6538	48.1082	34.2756	47.8403	45.1055	47.8812	58.6436	51.8509	58.0021	31.8866	34.0661	28.2597	45.8127	53.2623	44.2516	32.2246	39.7349	46.706	27.4031	51.4769	32.7936	28.8485	23.9569	37.8098	37.9704
DP	NUP42	10	5301108	5318590	0.00231	nucleoporin 42	27.8569	25.9977	27.1687	22.2525	12.9773	26.984	23.6371	38.532	37.7621	15.7295	19.3551	24.0808	19.2352	5.52311	24.3462	14.9446	15.9849	17.9438	22.6077	32.7754	24.3616	30.8228	35.7508	14.9758	26.6381	29.1613	30.3965	23.1011	19.9411	18.56	21.637	35.7856	30.1998	29.8476	20.8135	38.9216	24.337	39.4203	23.1484	24.6904	25.0682	20.4244	19.8855
DP	SAMD4A	17	74106025	74329721	0.00236	sterile alpha motif domain containing 4A	14.3637	15.1244	18.6156	7.85817	10.8412	12.6872	16.0683	11.6667	7.91397	16.9743	20.3868	22.2284	19.8722	20.2303	12.6395	15.1858	11.5447	18.3516	11.1622	7.06176	26.1917	10.5932	11.3711	10.6812	12.5901	22.6117	10.5076	16.1813	9.97056	15.7922	18.1342	7.49001	6.59892	11.088	8.51463	10.0084	7.40626	11.912	32.4721	21.2219	25.9533	27.1089	20.7467
DP	LOC127491760	7	75428369	75428896	0.00239	60S ribosomal protein L23a-like	5.22317	4.90522	9.05622	5.54694	2.40916	8.72243	6.64896	0	0.83305	3.96068	4.94225	6.79201	7.07778	8.77459	10.4602	3.57313	0.888051	4.89376	7.72764	1.76544	1.94013	3.41716	1.51615	5.89307	5.30111	2.33914	5.88427	2.85552	7.47792	5.81818	5.72659	3.32889	3.10537	4.85102	3.78428	4.44819	1.48125	4.25429	8.35914	3.31592	3.32735	4.99374	3.13158
DP	PHF20L1	3	148240090	148317594	0.0025	PHD finger protein 20 like 1	21.7632	32.7015	29.1811	58.2336	61.024	53.1275	28.8122	12.7273	19.1601	33.3828	29.6473	22.8397	48.4501	37.0483	48.8145	50.0239	47.0667	70.1438	54.0935	38.8308	25.8684	28.7042	31.8392	22.8356	30.4748	46.775	53.799	57.1104	51.5146	48.2078	62.0381	24.9667	21.7298	54.7403	39.7349	36.6975	39.9938	34.8767	26.357	31.1697	33.9323	27.1089	30.5329
DP	TAOK1	19	16225180	16400102	0.00276	TAO kinase 1	27.8569	28.6138	25.1562	36.9796	45.774	22.9955	26.5958	10.6061	15.8279	43.0016	19.769	24.0808	29.4	45.3354	51.4296	32.1582	31.9698	39.9657	37.7796	15.889	27.1618	24.6036	18.9519	18.4158	25.8429	21.0522	31.1026	50.4475	36.5587	33.2467	32.4507	17.4767	38.8172	36.7291	15.1371	33.3614	22.2188	22.1223	46.2968	49.7389	33.2735	62.0651	39.9276
DP	PERP	12	27412706	27424382	0.0028	p53 apoptosis effector related to PMP22	2.61159	0.817536	0	3.69796	1.60611	3.17179	0	2.12122	4.16525	1.69743	1.23556	0.617455	3.81111	0.487477	0.871687	3.57313	1.7761	0	2.57588	3.53088	4.52697	4.1006	3.0323	2.94653	1.98792	3.11885	1.68122	0	4.98528	4.98701	0	0.832224	0	0	0.94607	0	3.70313	5.10515	3.85807	2.65274	0	0.713392	0.782894
DP	C9H3orf20	9	105711305	105778281	0.00283	chromosome 9 C3orf20 homolog	4.75309	4.68448	7.01354	33.4481	42.9955	27.2616	38.1761	18.7516	15.9612	26.6327	22.3143	27.8534	27.097	9.59355	44.7088	25.6104	22.6542	31.4505	31.7778	32.7577	22.8353	29.9275	23.7808	25.1045	48.5185	48.6307	54.3791	39.3681	57.9705	76.4176	59.6711	18.8249	38.1573	29.7506	19.9242	32.1604	27.2476	37.3101	25.0067	27.436	19.7179	38.9084	21.3808
DP	NFKBIA	17	55971703	55974838	0.00295	NFKB inhibitor alpha	76.5021	28.0251	98.0788	78.7203	117.912	349.032	68.3735	44.8957	297.874	169.279	213.641	324.676	198.924	130.975	89.932	45.2448	101.753	18.6778	24.0158	24.2042	97.0582	204.804	68.5073	62.1203	47.9618	22.5259	50.3525	18.1611	42.8485	46.3792	68.2228	47.2037	75.1112	88.6905	28.5429	39.7334	96.9627	23.4582	117.594	226.159	202.556	356.289	178.985
DP	HEXA	17	1194371	1211503	0.00305	hexosaminidase subunit alpha	10.4463	8.58413	28.1749	8.78266	13.2504	5.15416	5.5408	5.83337	10.4131	14.7111	17.2979	17.2887	13.0667	25.1051	8.28103	10.2728	11.5447	5.30157	9.4449	15.889	10.6707	17.0858	14.0244	14.7327	13.9154	8.9667	21.8559	6.18696	9.55512	9.14286	4.29494	10.4028	11.6451	7.62303	9.93374	16.1247	10.7391	6.38144	12.5387	17.5744	18.3004	12.1277	11.7434
DP	SPATS2	4	41203824	41341557	0.00307	spermatogenesis associated serine rich 2	20.8927	15.5332	19.1187	10.1694	29.713	12.6872	16.6224	10.6061	9.9966	17.5401	16.0623	24.0808	17.9667	26.3238	22.6639	19.6522	14.2088	11.4188	17.1725	19.4198	18.1079	21.1864	12.8873	20.6257	17.8913	14.8145	17.6528	12.3739	23.2646	27.4286	19.0886	14.1478	18.6322	14.5531	16.0832	16.6807	22.9594	13.6137	25.0774	27.8538	19.2986	24.2553	14.875
DP	PRORP	17	55717567	55872328	0.00308	protein only RNase P catalytic subunit	9.35818	15.4106	11.8335	13.8951	16.1414	21.9092	26.9726	18.4865	12.9123	11.3502	15.3889	12.1083	14.602	10.4905	10.4515	19.8666	16.0293	21.2307	19.8429	19.6405	29.8392	19.1019	26.9496	21.3255	22.6358	36.0851	11.0204	20.8834	16.2853	16.9891	21.8183	18.1924	22.5062	22.0791	25.0709	27.4675	22.6928	26.6829	14.815	16.5465	16.2707	12.3417	17.1767
LW	RDH5	4	46872687	46880703	1.61e-06	retinol dehydrogenase 5	1.74106	3.95688	3.64261	0	1.60611	1.5859	2.08334	1.06061	0.83305	1.13162	2.99006	1.54364	1.24133	2.40814	0.871687	1.33993	1.91819	1.22344	2.14657	0.247162	0.64671	2.24166	0.257746	2.94653	1.32528	1.38789	2.38733	1.90368	1.94426	1.47948	0.954432	0.416112	0.869504	0	2.37464	1.11205	1.85156	0	1.46606	0.663185	0.891729	3.3244	0.782894
LW	MTARC2	16	33125338	33170445	6.8e-06	mitochondrial amidoxime reducing component 2	23.6436	45.4305	24.2304	15.439	23.152	16.2792	24.1136	7.9758	6.99762	14.9091	11.3857	14.5966	22.7469	15.8723	18.4536	21.7783	29.7763	19.4282	22.5647	14.1323	15.7344	16.8398	14.1457	4.74392	14.2335	16.7092	17.3334	25.5474	45.1002	27.121	18.7355	18.2007	17.5686	20.5614	19.9242	19.105	17.6121	9.1212	25.9648	16.9444	21.6278	10.4726	16.8322
LW	LOC100349925	13	7492521	7492963	0.000372	small EDRK-rich factor 2	14.5378	12.3284	21.9261	13.2572	12.8167	13.3057	15.0821	3.70154	4.00697	17.5628	16.2724	12.6455	19.0338	16.4621	18.227	12.3541	8.36544	15.6682	15.0603	8.35936	6.0144	12.1993	7.45946	10.2834	17.8383	11.3838	19.603	14.506	11.6074	6.53299	14.2019	6.38316	10.6126	7.73391	8.75115	9.4524	11.0724	6.5431	10.8733	14.8752	10.5344	9.37397	13.4423
LW	PDSS1	16	82745417	82788025	0.000415	decaprenyl diphosphate synthase subunit 1	25.7764	30.7475	23.8078	21.67	24.453	28.7761	23.8365	20.1728	17.7023	20.0354	14.1657	11.5341	15.9196	32.1686	17.887	23.0824	24.7766	36.54	17.1124	27.0554	26.5862	20.8789	32.2485	11.5578	25.3128	20.4051	31.8675	12.6404	16.144	18.3938	17.4279	25.8822	16.8001	16.8261	25.9791	20.2059	15.7235	22.1819	25.8555	25.7382	17.3621	18.6623	35.2068
LW	MRE11	1	136308077	136393039	0.000704	MRE11 homolog	14.503	22.0735	14.0874	23.7224	20.8794	19.5541	16.2456	9.54551	9.16355	13.3871	14.8267	6.79201	19.4149	16.896	17.7301	24.7082	23.0893	29.3625	16.3139	13.8234	25.2217	19.8195	17.4357	18.902	18.7792	19.2277	15.6858	15.8576	14.125	21.3278	28.9575	11.3682	21.7376	23.5621	11.0312	12.9665	15.5531	15.0262	16.9369	14.5901	18.8594	19.2616	14.875
LW	MKRN2OS	9	104634205	104679493	0.000723	MKRN2 opposite strand	1.74106	0.817536	2.01249	0	0.803053	2.10924	1.10816	1.06061	2.49915	0	0.617781	1.23491	0.359333	0.974954	1.30753	1.78657	2.66415	0	0.858627	3.53088	0.64671	0	2.27423	1.47327	0.662639	1.55943	1.68122	0	0.83088	0.831169	0	2.77963	2.32903	3.22939	0.94607	1.11205	1.48125	0.850858	1.92903	1.32637	0	0	0
LW	LOC100345784	18	2620119	2694300	0.000942	DNA excision repair protein ERCC-6	1.74106	0.817536	0	2.77347	3.21221	4.75769	2.21632	4.24245	0.83305	2.26324	3.08891	0.617455	0.544444	0.974954	0.871687	2.67985	1.7761	1.63125	1.71725	1.76544	0.64671	0.683433	0.758075	1.47327	2.65056	2.33914	2.52183	2.85552	0.83088	3.32467	0.954432	1.66445	0.776343	1.38601	1.89214	3.33614	2.22188	2.55257	6.43011	5.30548	3.99282	2.85357	4.69737
LW	LOC100340232	7	112967818	112968461	0.000981	60S ribosomal protein L9-like	0.870529	4.08768	5.03123	6.47143	3.21221	2.37884	4.43264	4.24245	0	13.0136	8.64894	3.08728	7.62222	6.3372	4.35844	0.893283	1.7761	3.2625	5.15176	4.4136	1.94013	3.41716	2.27423	3.68317	1.98792	4.67828	6.72488	4.7592	1.66176	2.49351	0.954432	0.832224	3.88172	6.23702	0.94607	2.22409	2.22188	1.70172	24.4344	9.94777	16.6367	25.6821	8.61184
LW	METTL3	17	42679285	42688583	0.000989	methyltransferase 3	15.8523	8.9602	10.4147	5.61166	8.1269	20.8466	26.0418	22.7183	20.2015	10.2412	11.2251	9.2433	12.1193	7.71676	11.0094	18.3748	12.5659	15.3664	15.7215	16.9482	16.0513	9.06232	12.5537	6.07723	15.9564	16.6625	11.5584	10.5178	11.0341	17.0556	9.94518	11.1352	17.3047	11.9889	15.6669	18.1486	20.5894	17.4256	4.70041	3.52814	10.5011	6.79149	15.2195
LW	ANKRD50	15	97289968	97346479	0.00133	ankyrin repeat domain containing 50	20.8927	13.0806	18.1124	26.801	28.0988	11.8942	5.5408	9.54551	10.8296	12.4478	12.9734	19.1349	12.5168	14.132	14.8187	16.0791	10.6477	17.12	22.3157	19.4198	9.70065	7.52459	10.6131	16.9426	13.2528	22.6039	11.7685	22.8346	23.2646	23.2644	26.7241	10.8189	15.5191	19.411	10.4068	12.2325	14.8125	11.0612	21.2194	23.2048	19.9641	25.6821	21.921
LW	FBXO9	12	112956525	112995949	0.00158	F-box protein 9	40.8974	44.2287	42.9265	72.1657	50.1908	44.976	67.9967	66.1822	70.0595	35.1595	36.2885	30.5764	42.4884	30.3113	62.6046	54.3652	54.4375	55.9356	63.9162	73.5306	41.2989	59.7047	63.3448	49.2955	53.9786	38.0032	52.7903	34.9325	45.7815	56.6192	56.9605	70.8555	57.2941	49.716	66.8872	58.6493	53.9472	49.3328	67.6576	55.2168	60.1185	60.0676	63.6023
LW	MTHFD1	20	11766761	11833909	0.00183	methylenetetrahydrofolate dehydrogenase	40.114	34.9006	49.457	34.7146	23.1119	80.8728	44.0161	78.6338	114.478	24.7599	37.4931	27.3533	15.5602	20.5472	28.8005	38.0003	37.6267	31.4098	27.6306	42.2028	48.3416	47.6011	41.2999	33.8557	24.1267	20.5064	30.5982	22.1112	26.0979	30.0551	25.1684	48.5519	53.9714	32.1969	43.9828	42.5691	36.4758	55.2973	20.7757	15.8501	22.0403	22.8285	33.0225
LW	CLEC3B	9	102129563	102129661	0.00191	C-type lectin domain family 3 member B	0	0	0	3.69796	4.81832	0.792948	0	1.06061	0	0.565811	6.79559	1.85237	6.53333	7.31215	2.61506	1.78657	7.10441	0	0	0.88272	1.94013	4.78403	6.0646	3.68317	1.98792	0	0.84061	0	4.1544	0	4.77216	0.832224	0.776343	0	0.94607	0	2.22188	0.850858	4.50108	1.98955	1.99641	6.42052	7.04605
LW	TXN	1	17112115	17123038	0.00208	thioredoxin	219.277	190.077	194.678	146.032	147.561	257.629	200.344	172.721	171.725	207.788	225.768	199.623	217.723	310.035	137.439	184.972	124.167	134.847	151.745	242.554	242.743	189.687	243.266	217.749	258.668	202.749	220.685	173.987	148.736	165.669	177.954	204.294	234.153	201.927	203.15	220.697	172.255	186.159	172.507	169.391	133.28	170.13	173.435
LW	GPX1	9	99199786	99200914	0.00266	glutathione peroxidase 1	43.0912	86.806	55.7561	65.5371	57.6271	117.269	66.5007	104.629	52.2156	86.9255	117.521	108.931	110.555	86.1323	75.4445	74.1336	70.1738	72.8191	67.7714	100.454	99.0889	102.706	91.0373	70.1496	78.2179	51.9679	101.697	44.8507	75.0617	60.027	101.198	64.8885	70.9966	58.4548	53.8409	79.7782	79.6617	76.1348	65.2849	71.4449	72.037	68.7139	56.5719
LW	SMG8	19	26668074	26674873	0.00267	SMG8 nonsense mediated mRNA decay factor	3.48211	7.35783	5.03123	7.39592	6.42443	7.13653	4.43264	8.4849	10.8296	5.65811	4.32447	6.79201	5.44444	4.87477	5.23012	3.57313	7.10441	6.52501	2.57588	3.53088	7.76052	8.20119	3.79038	5.15643	9.27695	8.57684	7.56549	5.71104	4.98528	6.64935	3.81773	6.65779	3.88172	3.46501	11.3528	11.1205	6.66563	3.40343	3.85807	7.29503	5.32375	3.56696	4.69737
LW	FAR1	1	169240935	169311723	0.00267	fatty acyl-CoA reductase 1	22.3639	17.7487	20.8293	29.4358	27.6009	15.8828	14.8826	21.785	23.3337	14.4961	13.1958	11.7687	9.25556	11.0462	17.2333	12.4345	17.8409	16.0678	31.8121	30.9482	21.0116	27.1869	23.1668	23.7933	23.1195	12.1245	15.6438	17.6185	28.0754	25.4005	22.6105	11.1768	19.4552	13.77	3.31125	21.1289	15.9383	22.1138	23.2577	20.9566	20.2502	14.3463	24.5985
LW	NFX1	1	34214003	34283248	0.00267	nuclear transcription factor	24.5924	18.1248	19.9539	43.8393	28.8055	61.9134	38.8189	28.8274	34.6382	62.1147	41.7497	32.5893	40.2617	50.371	23.2479	27.397	23.8264	48.7336	31.9839	67.4839	70.8988	47.2935	54.1417	79.9616	72.4132	115.904	49.554	37.9118	54.2149	38.8738	41.68	25.6575	41.8449	45.6481	41.0878	59.5278	39.6457	52.2597	33.4366	43.1203	35.4895	28.3002	37.1483
LW	LOC127493194	12	123504690	123505616	0.00274	60S ribosomal protein L6-like	759.693	1251.63	934.722	1912.44	1494.59	1524.16	1920.76	1869.12	1259.05	1601.6	2139.27	1955.72	2131.24	1989.51	1533.39	1792.03	1490.4	1729.32	2079.42	2416.45	2107.99	2046.7	2093.79	2497.26	2361.94	2108.05	2775.16	1810.23	1731.8	1665.74	1600.75	2466.89	2343.43	1819.24	2425.65	2473.4	1991	1945.52	1608.37	1570.3	1678.95	1654.45	1713.8
LW	PLGRKT	1	62852122	62913236	0.00334	plasminogen receptor with a C-terminal lysine	106.561	122.5	106.421	124.483	71.6163	111.592	93.2628	96.293	72.9502	58.0013	58.9549	56.8738	67.8813	80.4288	61.916	109.284	70.3692	111.879	86.4981	94.4775	123.935	83.8845	96.5788	90.2229	87.0774	119.67	129.546	92.595	76.2499	80.9558	85.1544	84.4707	98.7974	89.3488	84.7963	96.6924	102.643	83.7074	53.1191	62.4123	69.6746	59.8892	74.2575
RLW	LOC100354303	16	51604144	51615028	0.000502	cytochrome c oxidase assembly factor 6 homolog	26.4118	49.4282	43.6308	35.8887	26.6855	43.0967	35.8157	44.1851	19.8266	25.0654	25.9406	30.4344	22.2297	27.6594	14.6879	20.8671	32.2895	42.0455	33.4264	32.4046	41.6546	41.5185	43.3922	30.4451	26.0152	31.0014	46.9145	11.8504	36.3012	29.7642	50.5562	38.4737	36.1621	28.427	39.0349	34.3511	27.9068	28.0528	32.4721	33.8224	25.5474	20.3887	31.5115
RLW	CALU	7	157706759	157739637	0.000871	calumenin	188.026	117.022	151.963	124.233	76.6595	103.242	130.43	253.264	297.907	97.5571	175.573	97.527	113.5	79.4198	105.692	129.839	116.788	92.5409	119.529	244.187	241.326	198.578	221.737	200.504	143.263	133.853	79.0846	122.368	88.1481	114.676	151.697	191.719	216.46	187.076	265.382	176.093	198.495	231.289	79.7526	91.6522	125.727	58.6765	68.7616
RLW	CBLB	14	115344063	115578334	0.00133	Cbl proto-oncogene B	5.22317	5.72275	4.04511	9.25415	8.84965	4.75769	4.44372	3.18184	9.9966	3.39486	7.40102	6.77966	8.71111	7.30728	13.0753	9.82612	8.00134	12.2262	12.0208	8.81837	9.71358	6.15089	4.53329	10.3055	5.9505	5.48138	17.6696	9.53743	11.624	9.15948	8.58988	0.832224	7.7712	3.45808	6.62249	4.45931	4.43635	7.67474	7.71613	7.29503	3.32735	7.85444	4.70519
RLW	MDP1	17	45159581	45161904	0.00133	magnesium dependent phosphatase 1	94.6178	78.0011	286.78	86.56	72.7245	93.9961	113.121	173.399	147.65	89.3359	178.625	174.147	99.0181	76.4998	117.312	82.6109	76.4168	70.364	73.4212	119.326	115.076	122.136	118.677	129.154	107.089	104.185	70.8887	65.5722	73.4664	85.1366	98.9746	95.2064	102.664	69.2517	87.2655	130.599	69.9521	75.4201	110	99.0202	105.43	130.073	144.828
RLW	DECR1	3	105232147	105284488	0.00163	2,4-dienoyl-CoA reductase 1	135.402	160.262	112.488	97.1916	50.6405	69.5812	100.167	131.77	102.632	42.6225	71.4155	67.8027	61.5059	69.9042	61.2273	86.2019	91.5136	115.362	84.154	89.2077	96.7607	75.4168	95.3583	92.1823	94.8833	110.033	81.0768	113.25	86.2121	82.9423	87.6168	97.1372	79.3889	72.696	93.6609	101.741	105.932	81.5803	64.1854	43.6177	76.123	39.9856	69.5836
RLW	LOC100357230	12	151548835	151549979	0.00182	GTP-binding nuclear protein Ran	307.854	360.305	345.837	392.252	376.785	391.011	487.989	484.541	435.435	511.776	475.852	508.178	495.477	450.984	412.177	427.391	406.647	460.657	482.48	604.866	512.944	546.91	488.367	543.555	507.668	573.081	509.536	392.957	312.419	427.379	378.9	554.81	600.75	469.093	467.283	570.947	495.53	692.658	393.806	438.717	358.395	428.463	388.331
RLW	RPL7	3	88858378	88861753	0.00184	ribosomal protein L7	723.618	996.413	948.971	1497.84	1036.32	1128.05	1541.86	1641.23	1076.68	992.262	1301.52	1146.63	1239.16	1214.69	1090.93	1380.57	1096.8	1408.9	1555.94	1555.18	1354.01	1323.45	1372	1486.99	1421.71	1432.54	2223.78	1473.41	1422.46	1262.18	1252.5	1896.84	1973.43	1576.01	1795.58	1968.92	1472.73	1519.85	1038.82	938.772	1111.33	1114.29	1134.05
RLW	LOC100344312	5	30460687	30462849	0.00253	protein FAM118A	4.35264	4.90522	6.03748	0	5.62137	4.75769	3.32448	2.12122	2.49915	2.82905	1.85334	4.32219	6.53333	4.87477	0.871687	3.57313	0.888051	2.44688	0.858627	5.29632	0.64671	0.683433	0.758075	2.2099	1.32528	0	0.84061	0	1.66176	1.66234	1.90886	0	1.55269	0.693003	2.83821	1.11205	2.22188	0.850858	4.50108	6.63185	7.98563	9.27409	2.34868
RLW	PPA1	18	13664587	13698447	0.00256	inorganic pyrophosphatase 1	162.98	213.843	125.68	190.251	170.962	179.103	277.76	291.499	228.689	182.055	196.504	180.729	174.903	155.344	169.866	224.044	205.415	247.298	232.027	326.739	263.993	260.552	230.675	279.015	238.245	277.523	229.218	265.582	158.008	223.102	189.76	302.48	314.38	211.768	230.122	310.483	286.267	327.666	108.27	170.989	158.069	116.475	139.191
RLW	EXOSC1	18	42551778	42562851	0.00288	exosome component 1	62.7825	55.0284	55.0819	51.4201	39.7511	59.3205	53.9674	62.2579	45.0347	58.2219	65.769	55.077	61.3099	52.3843	48.9801	38.438	44.3404	50.2099	65.8224	82.4549	68.9651	71.6921	76.7172	75.6965	88.6678	83.7801	47.5701	47.9537	45.15	47.5512	38.7022	69.3242	55.5396	59.9447	69.3375	77.6208	62.2718	81.793	56.7779	52.7431	44.3203	49.4166	52.6966
RLW	CTSC	1	142395927	142458512	0.00319	cathepsin C	35.8397	55.1183	21.2117	49.1274	43.7664	78.6129	94.3488	95.2217	98.933	98.966	125.064	97.385	92.5773	152.044	43.5844	103.389	71.4615	70.886	70.416	82.8256	180.529	99.3369	96.2756	146.354	132.495	109.207	60.8518	98.2013	73.2005	71.7299	53.2859	91.9607	88.2935	135.489	102.44	130.665	146.725	90.5909	83.9258	67.0414	78.2459	77.3531	73.2163
RLW	YEATS4	4	55880607	55979987	0.00324	YEATS domain containing 4	13.0579	13.8245	21.2922	9.67017	9.01829	7.00966	10.7159	7.67883	23.6586	11.2313	15.4136	18.499	6.90356	8.0385	9.73675	6.85148	14.644	13.4089	11.0162	8.46528	10.4508	11.9601	7.26236	3.55794	9.49562	8.11681	13.9709	11.7267	9.47203	11.2125	10.661	5.48435	7.50724	8.8635	3.94511	7.05037	8.7616	6.00706	10.5004	13.8274	21.2285	18.1344	25.0996
RLW	TAF5L	16	47266348	47290807	0.00359	TATA-box binding protein associated factor 5 like	0.870529	0.817536	1.00625	0.92449	2.40916	3.96474	1.10816	2.12122	1.6661	1.69743	2.47112	0.617455	3.26667	4.38729	0.871687	0	2.66415	2.44688	2.57588	1.76544	3.23355	2.0503	3.79038	6.6297	4.63848	4.67828	0.84061	2.85552	0.83088	3.32467	0	0.832224	1.55269	2.07901	1.89214	4.44819	2.22188	3.40343	3.21505	1.32637	1.33094	4.28035	1.56579
RLW	TNFSF4	13	1058758	1247171	0.0037	TNF superfamily member 4	0.870529	0.817536	1.00625	1.84898	0.803053	0.792948	0	2.12122	0.83305	0	0.617781	0	0.816667	0.974954	2.61506	1.78657	0	2.44688	1.71725	3.53088	1.94013	1.36687	1.51615	1.47327	0	0.779713	0.84061	0	0.83088	0.831169	0	0.832224	0.776343	1.38601	3.78428	1.11205	0.740626	0	1.92903	0	2.66188	0	1.56579
RLW	POGLUT1	14	100357953	100390070	0.00376	protein O-glucosyltransferase 1	1.13169	0.155332	0.181124	2.21878	1.03594	1.97444	1.19681	2.4288	1.98266	0.763845	1.4209	2.80325	0.800333	0.282737	1.42957	1.85803	0.0976856	0.424125	2.31829	2.3039	0.782519	2.26216	0.159196	0.788198	1.0801	0.288494	0.0588427	0.799545	1.57036	1.15532	2.15702	1.77264	1.97191	1.6147	2.10028	1.25661	2.31816	1.92294	0.0835914	1.70439	2.34245	0.206884	0.939473
RLW	ATP8A1	2	31975487	32236775	0.00399	ATPase phospholipid transporting 8A1	30.4685	31.0664	28.1749	52.6959	41.7588	22.2026	17.7306	13.788	22.4923	18.6718	15.4445	13.584	23.9556	14.6243	56.6597	41.9843	56.8353	60.3563	54.9521	25.5989	19.4013	17.0858	21.9842	19.1525	21.8671	34.3074	41.1899	95.184	68.9631	65.6623	72.5368	11.6511	26.3957	24.9481	17.0293	30.0253	17.775	23.824	31.5075	26.5274	15.3058	19.2616	22.7039
RLW	INTS7	16	24440276	24525849	0.00407	integrator complex subunit 7	8.27002	1.78223	5.47398	5.0847	2.13612	6.07398	1.10816	8.90914	14.5784	4.15305	6.1531	4.59387	2.87467	3.04186	3.45188	6.44951	2.16684	8.41726	8.96407	7.25596	10.3474	10.2515	13.9789	10.4749	5.4469	14.0348	4.15261	9.04248	5.11822	1.19688	8.79986	13.4987	6.50576	13.9848	10.4068	4.44819	8.30982	15.0262	6.36581	5.08	10.9403	4.0806	4.69737
RLW	COG3	8	62008559	62081203	0.00414	component of oligomeric golgi complex 3	14.799	15.5332	13.0812	13.8674	13.6519	17.4449	19.9469	15.9092	21.6593	18.6718	11.1201	9.26183	6.53333	12.1869	12.2036	16.9724	23.9774	6.52501	23.1829	17.6544	19.4013	19.1361	18.9519	22.8356	15.9033	13.2551	20.1746	11.4221	12.4632	9.97402	9.54432	7.49001	16.3032	15.9391	16.0832	14.4566	6.66563	21.2715	17.3613	13.9269	10.6475	12.1277	10.9605
RLW	FAM114A1	2	28778917	28847840	0.00416	family with sequence similarity 114 member A1	25.2453	17.1683	12.075	17.5653	22.4855	8.72243	14.4061	13.788	25.8245	19.2376	24.0935	22.8458	25.5889	24.3738	20.0488	16.9724	23.9774	12.2344	24.0416	30.0125	22.6348	19.8195	23.5003	22.8356	14.5781	22.6117	26.0589	28.5552	14.125	22.4416	22.9064	24.1345	23.2903	30.4921	19.8675	15.5687	30.3657	22.9732	18.6473	16.5796	19.2986	20.6884	16.4408
RLW	SYPL1	7	130964601	130992646	0.00424	synaptophysin like 1	10.1678	14.544	6.73179	8.10778	7.43627	10.7524	15.1596	9.47126	9.70503	6.67091	5.27585	5.08783	8.44978	4.37267	9.18758	17.1332	8.16119	12.0142	12.3385	6.01132	11.6796	7.90731	4.52571	7.67572	7.66011	10.7055	8.18754	13.0878	13.7095	9.76623	12.9039	8.33056	8.92795	10.4574	3.85051	11.7321	2.37741	11.7333	11.6514	8.44234	6.76782	8.31101	14.8124
WF	ASPA	19	12512577	12536892	0.000408	aspartoacylase	22.7643	60.7348	37.4424	75.6048	44.8184	63.7213	122.463	87.6596	116.252	38.1866	51.7454	43.7652	35.6666	29.78	78.1032	152.421	97.0018	112.565	96.0632	84.1938	59.258	82.0939	120.428	71.3651	57.093	77.7374	71.1072	63.2878	133.124	117.186	91.9213	97.0789	46.4098	46.5698	65.6194	43.9258	53.9324	74.2544	86.1892	47.6631	66.0079	34.4211	58.4431
WF	MECR	13	136408849	136440142	0.000649	mitochondrial trans-2-enoyl-CoA reductase	33.0627	34.9415	42.5843	15.5869	22.2125	27.2774	14.1623	26.8123	51.066	19.4865	22.6355	28.1498	21.5001	12.611	24.7821	36.2048	23.2314	6.21507	13.5663	24.875	26.6832	27.9182	27.3438	23.3513	21.7478	12.912	10.2807	3.59795	9.75453	25.2509	27.6785	23.0609	17.623	9.32781	18.7133	14.6123	26.8921	28.6994	29.257	26.6004	37.7055	30.1123	42.8008
WF	MYF6	4	67515503	67517420	0.000734	myogenic factor 6	205.07	317.441	304.48	349.014	246.955	1022.07	341.69	387.42	190.094	293.978	377.761	265.981	312.07	182.882	427.615	621.305	625.898	528.069	418.804	308.263	413.202	412.534	379.523	288.996	370.786	494.003	494.481	301.781	440.184	422.184	487.056	316.528	306.811	260.527	314.795	311.429	393.043	617.902	194.061	263.185	298.989	132.042	296.74
WF	COQ5	21	12530306	12550967	0.000737	coenzyme Q5	33.9506	39.2417	34.2124	38.8286	28.1069	38.8545	45.4346	42.4245	49.1499	43.5674	27.1824	36.4299	28.3111	30.7111	49.6862	42.8776	26.6415	42.4125	24.0416	56.4941	45.2697	55.358	52.3072	51.5643	40.421	50.6813	26.0589	32.3625	41.544	32.4156	35.314	42.4434	17.0796	39.5011	22.7057	21.1289	36.2907	40.8412	17.3613	25.8642	13.9749	32.816	24.2697
WF	SKIC2	12	134944202	134956962	0.000792	SKI2 subunit of superkiller complex subunit RPC10-like	22.6337	19.6209	23.1437	12.9429	13.6519	23.7884	14.4061	11.6667	16.661	18.1059	17.2979	19.1411	9.25556	12.1869	15.6904	9.82612	18.6491	9.78751	14.5967	6.17904	8.40723	10.9349	9.85498	5.89307	9.93959	5.45799	11.7685	6.66288	10.8014	13.2987	18.1342	11.6511	13.1978	11.088	19.8675	6.67228	14.8125	15.3154	16.0753	14.5901	12.6439	14.2678	16.4408
WF	C16H1orf131	16	48705549	48725486	0.000884	chromosome 16 C1orf131 homolog	70.5128	89.1115	80.4997	84.1286	64.2443	95.1538	52.0835	54.0912	30.8228	50.923	37.0669	45.6917	47.3667	63.8595	36.6109	62.5298	42.6264	44.8594	49.8004	54.7286	59.4973	53.9912	46.2426	54.5109	66.2639	53.8002	94.1483	70.4361	34.897	49.039	63.9469	62.4168	48.1333	64.4492	51.0878	45.5939	43.6969	56.1566	68.8022	80.9086	48.5793	61.3517	89.2499
WF	SSRP1	1	204164571	204174849	0.00147	structure specific recognition protein 1	30.5556	33.8215	47.0521	28.123	51.9495	48.0209	42.2542	44.0472	42.7938	65.1757	47.217	43.5306	57.7601	54.846	46.7486	32.185	37.7688	38.7178	25.0118	25.9255	22.8741	38.2927	25.3728	35.7267	40.2951	24.8339	35.3308	36.4935	35.5367	43.9688	26.4473	22.029	25.7668	25.3154	32.0907	25.6994	38.9791	38.3567	67.0725	68.0826	58.7876	69.841	69.0591
WF	ZNF18	19	5302867	5335496	0.00149	zinc finger protein 18	5.36246	7.15344	5.78592	4.30812	4.81832	1.5859	4.43264	1.06061	3.88201	3.39486	1.85334	2.46982	4.08878	4.58228	3.48675	3.26942	5.02637	4.07813	6.01039	6.17904	4.52697	5.46746	6.0646	4.67026	3.97584	5.45799	4.20305	3.80736	3.53955	3.32467	1.90886	9.15446	3.10537	5.3084	5.67642	6.67228	6.66563	5.95601	2.25697	3.18329	6.65469	2.85357	1.2996
WF	LOC100353836	2	113424470	113425663	0.00193	non-histone chromosomal protein HMG-14	38.3033	31.0664	37.7342	24.9612	36.9405	24.5814	19.9469	16.4395	9.9966	32.817	26.8735	35.8124	32.9389	49.7227	14.8187	30.3716	22.2013	26.1	27.0468	23.3921	22.3115	27.679	24.6375	26.5188	29.8188	18.7131	24.798	24.7478	21.6029	34.0779	15.2709	20.8056	11.6451	24.2551	22.7057	16.6807	21.4781	22.9732	28.614	43.7702	36.2681	42.8035	21.921
WF	LOC100339548	2	100542705	100557610	0.00205	eukaryotic translation initiation factor 1A	25.254	96.4775	15.0937	110.024	76.6836	13.4801	11.0816	11.1364	21.6593	51.7773	12.3556	11.1142	18.7888	12.1869	9.58856	98.7078	75.9284	110.517	97.4628	19.4198	92.8028	59.4586	88.7024	10.3129	62.6194	98.6337	11.7685	12.3739	76.8564	91.8525	103.374	86.2683	8.53978	12.474	8.51463	11.1205	82.9427	91.9012	47.3963	61.6696	63.2196	8.5607	15.6579
WF	LOC100352072	7	79462592	79463069	0.00216	60S ribosomal protein L23a-like	0.870529	0.817536	1.00625	0.92449	4.01527	3.17179	2.21632	1.06061	0	3.96068	5.56003	4.93964	4.9	9.26206	2.61506	3.57313	3.5522	5.70938	5.15176	1.76544	3.23355	0.683433	0.758075	5.89307	5.30111	1.55943	13.4498	2.85552	4.1544	2.49351	0	1.66445	1.55269	9.00903	2.83821	4.44819	2.9625	4.25429	8.35914	6.63185	5.32375	3.56696	3.13158
WF	SRPRB	8	83155829	83164716	0.00218	SRP receptor subunit beta	38.7385	54.6359	43.2686	37.9041	42.4253	88.5485	56.5162	76.7141	57.4804	49.2255	71.0448	56.6021	55.6259	43.6292	44.4561	69.0776	56.9862	30.7246	56.9527	64.2885	71.9982	66.9764	66.7106	62.0024	54.8864	55.6169	44.2749	37.1217	50.8249	48.0665	51.8543	53.9531	49.554	46.2025	63.6989	58.5715	74.307	66.0862	36.8638	58.5791	67.8779	57.3067	54.2781
WF	TAF9	11	4058943	4060836	0.00235	TATA-box binding protein associated factor 9	35.6917	36.7891	21.1312	23.1123	20.0763	23.7884	23.2714	19.091	24.9915	20.935	14.8267	22.2284	19.6	22.4239	14.8187	28.5851	16.873	23.6532	18.0312	48.5496	37.5092	34.8551	29.5649	44.9346	60.9628	32.7479	30.262	22.8441	15.7867	19.948	13.362	26.6312	16.3032	21.4831	15.1371	21.1289	19.9969	11.912	12.8602	27.8538	17.9677	13.5544	18.0066
WF	OMD	1	84305301	84316047	0.00245	osteomodulin	0	0	1.00625	0	0.803053	0.792948	2.21632	0	4.16525	0	1.23556	1.23491	2.17778	57.5223	0.871687	1.78657	0.888051	0	0.858627	0	1.94013	0.683433	2.27423	0.736634	0	0.779713	3.36244	0.95184	0.83088	2.49351	3.81773	0	0	3.46501	0.94607	0	0.740626	0	0.643011	3.31592	1.33094	2.14017	2.34868
WF	PPARG	9	104432081	104570730	0.00249	peroxisome proliferator activated receptor gamma	2.61159	8.69859	4.36711	3.69796	4.2883	2.10924	11.813	0	12.2125	6.7671	15.0368	3.08728	8.87444	36.4243	4.35844	8.93283	5.02637	3.50719	12.0208	10.01	30.5053	9.06915	11.1134	23.2776	10.8275	11.1499	25.2183	19.9791	4.12117	5.81818	4.8676	4.71039	5.94679	11.2959	8.19297	7.40623	4.69557	9.35944	3.21505	10.3722	5.98922	13.5687	7.04605
WF	TTC39B	1	52859839	53003483	0.00261	tetratricopeptide repeat domain 39B	6.085	12.2549	5.04129	16.6501	6.42443	5.55064	1.09708	5.30306	5.83135	5.85048	2.46495	5.55092	11.0686	4.38242	8.70816	7.13733	7.98358	17.9356	3.42592	7.05293	8.40723	3.41033	7.58075	3.43271	3.3132	7.78933	6.73329	8.57607	8.3088	4.99532	7.95996	2.48835	5.42664	15.253	9.4607	7.7732	5.9176	8.51709	16.7247	7.29503	6.64804	9.27409	13.3014
WF	CCDC43	19	43127092	43169446	0.00264	coiled-coil domain containing 43	47.8791	81.7536	78.4872	81.3551	101.185	78.5019	78.6794	86.9702	57.4804	67.8973	79.7803	74.7121	88.2	58.0098	72.35	70.5694	85.5104	61.9876	66.9729	76.7966	104.12	75.861	56.8557	64.9711	61.6255	47.5625	62.3228	48.5438	45.6984	54.8571	55.357	50.7656	44.2516	38.8081	54.8721	65.6107	60.7313	79.1298	124.101	104.783	145.072	104.869	108.822
WF	PLAGL2	4	14753042	14766808	0.0028	PLAG1 like zinc finger 2	19.1603	13.8899	17.0961	27.7347	19.2653	10.3004	6.63788	10.6061	13.3371	20.9293	22.2463	16.0477	20.1499	18.0366	19.1684	16.9724	14.2177	13.0582	10.3035	30.0125	14.2276	25.2938	14.4034	14.7253	29.1561	20.2803	13.4498	15.239	14.9558	18.2774	13.3716	9.16278	16.2954	18.0181	17.0293	11.1205	11.1094	17.8595	27	20.5521	17.3022	19.2616	26.6106
WF	DYNC1LI1	14	20767707	20803451	0.00288	dynein cytoplasmic 1 light intermediate chain 1	44.4318	44.8991	66.5934	37.8209	19.5784	49.7892	35.6163	66.2352	83.0384	28.3641	41.5149	33.003	37.0168	17.1836	28.6785	33.7929	34.8294	23.4411	30.6015	39.3516	47.753	40.6437	35.1747	34.9533	25.1074	34.7752	23.8733	22.4063	30.028	35.8234	46.0609	41.5363	32.6219	28.7319	52.0149	40.5563	35.3649	48.0565	24.8588	34.8238	36.2947	25.2683	33.226
WF	BCAS3	19	24553552	25159574	0.00291	BCAS3 microtubule associated cell migration factor	4.56157	7.9955	8.55309	3.36514	4.17588	13.829	14.1845	8.16671	5.99796	5.36954	5.74537	6.00166	6.42444	8.33098	16.5533	8.39686	11.7489	11.2556	3.94969	9.35683	5.5617	9.11699	8.824	4.30194	9.93959	8.29614	8.49016	6.9865	11.2501	13.2488	8.87621	8.98802	6.35825	11.5731	7.09553	8.16242	11.4723	8.37244	8.67422	7.04966	10.2416	6.02103	7.77414
DL	SEPTIN8	3	15743195	15767947	9.21e-05	septin 8	5.36246	9.1237	3.36086	5.69486	10.7047	3.04492	2.7704	4.60306	4.16525	11.882	8.13	8.74316	8.98333	15.765	7.98466	7.28919	13.0188	6.65551	8.01958	6.76163	4.42349	6.72498	5.93573	4.53766	7.62035	2.9941	14.7107	8.89018	13.7095	8.31169	7.63545	8.45539	2.7172	7.38741	6.47112	3.51407	6.41382	10.6357	7.39463	11.0487	11.2065	6.30638	5.99697
DL	CBX7	4	91793013	91806578	0.000513	chromobox 7	18.2811	22.891	20.1249	25.8857	31.3191	60.2641	47.6509	25.4547	34.155	45.8307	30.8891	41.9869	53.9	32.661	41.841	32.1582	32.8579	30.9938	26.6174	30.8952	31.0421	39.6391	29.5649	27.9921	33.7946	31.1885	21.0153	19.0368	24.9264	32.4156	43.9039	40.779	26.3957	27.0271	37.8428	30.0253	40.7344	40.8412	29.5785	39.7911	24.6224	38.5231	21.1381
DL	MYZAP	17	15720617	15822329	0.000523	myocardial zonula adherens protein	8.70529	4.70083	6.5406	3.46684	6.82595	6.9383	6.64896	8.4849	11.6627	11.882	6.17781	13.1209	6.26111	12.7963	14.3828	11.3894	18.6491	7.54454	10.3035	3.53088	8.73058	8.20119	4.92749	9.57624	3.97584	1.55943	7.14519	10.2323	16.4099	7.8961	4.53355	12.6914	10.4806	7.44978	8.98767	4.44819	15.368	5.95601	9.16291	14.4243	21.1286	10.3442	8.02467
DL	RTN4RL1	19	13747028	13827422	0.0006	reticulon 4 receptor like 1	0	1.63507	1.00625	9.2449	3.21221	2.37884	0	3.18184	0.83305	2.82905	2.47112	3.08728	2.72222	2.43738	2.61506	8.03955	1.7761	3.2625	5.15176	3.53088	1.29342	3.41716	3.0323	2.2099	1.98792	3.11885	2.52183	4.7592	4.98528	4.15584	3.81773	4.16112	6.21075	3.46501	3.78428	2.22409	0.740626	4.25429	7.07312	5.30548	6.65469	4.28035	3.13158
DL	LAP3	2	8717134	8743961	0.000667	leucine aminopeptidase 3	137.047	145.047	95.3217	72.1934	59.2653	84.1397	114.927	135.122	152.906	83.1233	78.2914	65.9689	67.1518	64.2641	54.2974	84.0937	73.7349	90.4937	80.4276	108.804	112.198	90.9444	100.49	91.3941	65.3362	90.0334	61.5915	82.9623	65.4567	79.0608	77.204	147.254	128.097	97.8381	120.529	136.348	149.547	122.49	55.1382	49.2481	89.4391	30.6544	67.7517
DL	NAB1	7	42508166	42558581	0.000689	NGFI-A binding protein 1	22.6337	22.0735	18.1124	22.1878	21.6824	15.066	7.75712	6.36367	5.83135	14.7111	6.17781	14.2015	18.5111	17.0617	10.4602	20.5455	12.4327	21.2063	20.6071	10.5926	7.76052	10.9349	11.3711	5.15643	11.9275	7.01741	10.9279	18.085	12.4632	18.2857	15.2709	8.32224	10.8688	13.167	10.4068	11.1205	17.0344	7.65772	19.9333	25.8642	16.6367	22.8285	25.8355
DL	RSPRY1	5	13411087	13461156	0.000689	ring finger and SPRY domain containing 1	82.0386	30.862	49.8092	45.79	30.9015	53.6509	47.8836	62.9261	62.8953	40.1273	34.5649	30.3603	37.1039	39.9829	31.9212	35.8028	30.3625	35.9936	32.147	58.1359	65.9903	50.7175	62.5412	68.5659	49.1082	73.1994	38.2562	46.6401	31.7729	31.4431	52.8564	42.8845	47.7141	65.1422	52.9326	53.6562	39.7272	47.7757	43.2939	40.567	52.4922	31.2466	54.8887
DL	EMX2	18	61815803	61822408	0.000777	empty spiracles homeobox 2	5.22317	3.27015	3.52186	8.32041	8.83359	6.34359	0.55408	1.59092	4.9983	5.65811	4.63336	10.4967	12.5222	14.3806	4.35844	1.78657	1.33208	2.85469	3.43451	3.97224	2.58684	3.41716	6.82268	4.78812	8.28299	7.79713	5.88427	2.3796	0.41544	2.90909	4.29494	2.49667	6.21075	4.15802	3.31125	6.67228	8.14688	2.55257	4.82258	6.30026	2.32914	11.771	0.782894
DL	MYCL	13	126691876	126698351	0.000785	MYCL proto-oncogene	13.0579	10.628	3.01874	2.77347	20.0763	2.37884	8.86528	8.4849	3.3322	11.882	12.3556	7.40946	32.6667	2.43738	9.58856	5.3597	4.44025	14.6813	7.72764	15.0062	12.2875	12.9852	12.8873	11.7861	20.5418	33.5276	4.20305	9.5184	2.49264	1.66234	2.86329	5.82557	13.9742	9.70204	13.245	20.0168	8.88751	3.40343	8.35914	11.2741	7.32016	11.4143	8.61184
DL	WSB1	19	18144838	18159768	0.00085	WD repeat and SOCS box containing 1	18.3159	21.8282	19.4004	21.6885	29.986	20.5532	19.9247	18.5183	13.6454	14.1792	15.8523	15.4734	8.21022	9.31569	17.0676	30.0322	33.7282	25.627	30.6873	17.3366	27.33	21.4598	16.6019	13.7456	8.82636	21.4733	15.6858	29.8116	26.5549	25.5169	24.0517	26.6644	20.6507	22.1899	23.0652	21.4847	28.2475	17.851	16.1139	8.10412	23.917	9.10288	11.0232
DL	NDUFAF1	17	31645814	31665136	0.00092	NADH:ubiquinone oxidoreductase complex assembly factor 1	56.1665	60.3669	37.4927	36.6375	26.6212	39.1082	44.3153	57.867	42.5272	30.5368	28.6712	27.2606	32.9443	25.4658	23.8319	34.5075	82.5177	101.309	53.7071	38.1865	68.3766	62.951	30.1487	79.2397	37.6247	40.6776	59.1033	37.3597	27.1199	60.0104	30.6373	56.6828	43.7004	55.357	36.6981	58.3713	35.3575	44.8232	28.4854	29.021	39.5422	36.6041	49.2597
DL	ASB3	2	132683244	132869256	0.000974	ankyrin repeat and SOCS box containing 3	6.28522	1.99479	1.24775	5.68561	5.88638	12.3303	8.52175	9.82127	8.3305	4.65096	7.66049	3.71708	1.98722	2.54463	6.60739	5.23464	8.09902	5.97038	6.91195	13.9293	15.1136	11.6184	17.5722	5.87834	12.0667	10.5729	4.8167	8.11919	9.3474	7.13974	11.7777	9.75366	12.0178	7.30425	9.15796	10.1419	5.98426	11.4185	5.85783	5.00705	4.99102	3.06045	6.59197
DL	TLK1	7	62736649	62882848	0.00119	tousled like kinase 1	19.0036	17.3726	12.075	14.5607	10.6405	11.7594	12.1898	6.62882	5.41482	13.1551	8.03116	9.72492	14.6074	14.6243	14.0167	17.6423	13.5428	11.0109	8.58627	4.85496	8.62064	9.11016	5.30653	13.0752	13.7498	12.4754	9.66702	8.80452	17.4485	11.6364	9.85928	7.49001	7.24328	13.5135	16.0832	10.5644	14.4422	15.3154	13.7154	11.9373	14.6403	15.6946	10.6317
DL	LAMTOR1	1	158117017	158124787	0.00143	late endosomal/lysosomal adaptor	240.701	266.517	259.612	173.342	145.754	187.532	168.44	284.774	186.603	177.099	232.595	243.895	168.778	163.061	187.849	201.882	229.117	107.663	136.522	171.689	163.294	219.724	189.519	147.327	134.184	125.924	164.76	89.4729	200.242	165.403	200.431	221.372	219.705	136.521	228.476	164.027	192.563	178.255	186.152	152.864	181.673	164.08	187.503
DL	MRPL1	15	69364095	69564663	0.00176	mitochondrial ribosomal protein L1	5.22317	3.27015	0	6.65633	5.94259	3.96474	1.10816	4.24245	3.49881	2.26324	2.47112	4.44568	1.74222	2.0474	9.58856	5.3597	6.21636	7.50376	5.15176	3.53088	0.64671	1.50355	6.82268	0.736634	2.65056	6.2377	6.72488	5.71104	5.98234	2.49351	4.77216	4.16112	3.88172	4.15802	3.02742	4.44819	3.85125	1.87189	4.50108	2.91801	1.99641	1.42678	1.72237
DL	LOC100356012	2	64073001	64097041	0.00177	cytochrome P450 4V2	2.03704	3.54811	0.664123	0.92449	1.87914	1.8555	4.05587	2.48183	3.04896	4.33411	4.32447	4.53212	1.99267	4.55304	1.16806	4.1627	2.36222	1.90856	2.28395	2.34803	2.16001	0	4.54845	2.2099	2.42526	3.38395	0.554803	3.65506	1.66176	2.7761	0.954432	1.38149	1.0403	4.15802	5.67642	4.07009	5.43619	5.39444	3.21505	3.31592	5.09749	2.38273	2.86539
DL	NPM1	3	52495864	52509897	0.00209	nucleophosmin 1	124.747	154.899	112.327	207.077	129.966	344.124	252.073	239.274	181.53	116.659	127.522	116.501	162.544	142.304	132.549	202.373	167.22	160.768	189.928	200.201	182.482	155.18	173.501	186.324	174.937	179.342	232.219	202.133	158.64	155.828	150.762	268.842	270.098	234.332	266.697	319.38	260.685	208.554	106.438	107.31	120.23	104.826	126.931
DL	TCEA3	13	129894917	129909749	0.00212	transcription elongation factor A3	62.6781	90.7465	105.656	163.635	189.521	123.7	129.655	91.2126	89.1363	444.727	273.677	411.225	350.078	259.825	142.085	162.578	182.05	131.316	98.7421	177.427	223.115	414.16	237.278	191.525	284.935	200.386	147.947	92.3284	171.992	167.065	165.117	133.988	126.544	114.345	117.313	132.334	121.463	176.128	303.501	402.553	223.598	437.309	271.664
DL	CNOT8	3	36135687	36155307	0.00215	CCR4-NOT transcription complex subunit 8	13.2146	15.6068	20.5677	15.8088	14.8886	26.8096	16.1127	29.5486	43.5185	17.7325	30.2775	23.2163	18.6908	13.2837	11.9683	17.5441	22.965	8.64563	8.48324	20.2496	26.7867	31.2602	17.3902	27.5796	10.2577	12.2103	6.92663	4.80679	12.8122	17.9865	25.4451	21.8875	12.2662	9.73669	23.122	21.3735	14.3237	17.3745	13.5675	18.7416	30.7513	12.8268	28.0824
DL	LOC100338668	14	51706112	51707343	0.00223	tRNA selenocysteine 1-associated protein 1	26.2987	27.7145	27.2995	22.3449	8.77737	13.0678	13.1206	11.4334	10.1632	7.67239	16.3836	10.2806	10.5622	10.822	11.8026	13.703	14.8926	16.549	15.0775	19.0403	18.7934	13.9284	10.5752	11.3957	14.5913	11.9998	20.1494	10.594	15.8615	12.8083	17.7715	16.5945	18.0733	14.0333	16.49	13.3557	8.34685	11.5461	12.2558	12.2026	10.8804	9.73066	9.42605
CL	EIF3H	3	132074486	132191284	0.000105	eukaryotic translation initiation factor 3 subunit H	151.08	198.735	158.172	217.44	136.897	224.722	198.638	188.29	175.232	130.651	139.569	132.037	149.445	141.71	153.373	204.875	168.605	184.454	204.113	207.271	175.653	159.376	174.304	189.05	212.648	199.63	233.824	183.191	159.421	174.346	171.645	209.895	196.143	187.783	185.969	265.379	211.967	188.457	126.744	125.335	131.969	98.1556	138.635
CL	CEP97	14	119852181	119884251	0.000133	centrosomal protein 97	7.18186	5.175	6.7016	5.54694	9.70088	5.81231	4.43264	2.12122	4.23189	3.01577	3.50282	3.70473	4.35556	5.03564	5.7357	5.9582	4.5113	12.2344	8.44889	4.26354	6.89393	2.95926	4.29829	5.39952	3.36621	4.67828	3.63984	6.18696	5.81616	7.7548	11.854	1.66445	4.13791	3.98476	4.25732	6.3053	6.97669	5.10515	6.26936	4.86115	3.99282	4.57997	3.91447
CL	DDX20	13	52683948	52697269	0.000546	DEAD-box helicase 20	15.6695	15.5332	18.1124	25.8857	18.4702	26.9602	11.0816	18.0304	13.3288	26.0273	19.1512	21.6109	22.3222	19.4991	16.5621	13.3993	19.5371	17.9438	25.7588	18.5371	12.2875	11.6184	8.33883	13.996	13.2528	14.8145	16.8122	17.1331	19.1102	19.948	17.1798	9.98668	20.1849	13.167	13.245	15.5687	10.3688	17.868	21.8624	21.8851	15.9713	29.2491	22.7039
CL	NOM1	13	10636000	10662137	0.000591	nucleolar protein with MIF4G domain 1	8.52248	4.08768	6.84248	7.11857	10.6003	7.49336	4.54346	3.60608	4.83169	5.77127	5.80097	7.37859	9.44611	5.60599	6.62482	9.33481	2.97497	10.2443	3.77796	4.23705	7.79285	3.41716	2.57746	6.29822	6.59326	2.65102	8.02783	7.37676	6.31469	7.8961	4.91532	5.11818	3.99817	4.85102	2.649	8.60724	6.6286	4.59463	9.61301	5.40496	3.82645	9.802	8.10296
CL	LOC127484271	18	34224511	34234811	0.000673	interferon-induced protein with tetratricopeptide repeats 1	2.61159	7.35783	0	2.77347	6.42443	1.5859	1.10816	0	1.6661	5.23375	10.5023	6.79201	4.35556	6.82468	0.217922	2.67985	3.5522	13.8656	0	1.76544	2.58684	2.0503	6.0646	0.920792	2.65056	0	0.84061	1.90368	6.02388	3.32467	0.954432	9.98668	6.21075	16.6321	4.73035	15.5687	7.40626	4.25429	1.28602	0.663185	3.32735	1.42678	1.76151
CL	KDSR	9	12589010	12629833	0.00127	3-ketodihydrosphingosine reductase	6.0937	13.0724	6.03748	11.0939	16.8641	11.0933	4.43264	4.24245	5.83135	11.8764	11.7378	11.7316	12.5222	15.5993	13.0753	14.2925	8.88051	8.96373	7.72764	10.5926	7.11381	5.46746	6.82268	5.15643	9.27695	10.1363	15.9716	9.5184	13.2941	12.4675	11.4532	7.49001	4.65806	15.9391	4.73035	14.4566	12.5832	10.2103	11.5742	11.9307	12.6439	17.1285	17.2237
CL	CUEDC2	18	47323904	47333053	0.00171	CUE domain containing 2	101.808	86.9695	108.312	59.4909	37.2858	49.9795	73.9808	67.2534	71.6006	46.6454	52.4867	53.9965	48.8802	40.2948	44.0987	58.6709	47.4308	48.595	58.5584	56.2999	48.6843	62.992	52.7166	57.8405	54.0846	43.5236	49.2261	41.3098	56.7574	51.1418	56.97	60.6691	59.53	46.4797	53.8219	49.4861	60.5758	65.5927	41.4935	45.7863	39.2693	39.529	51.0995
CL	MPDZ	1	54855824	55040572	0.0018	multiple PDZ domain crumbs cell polarity complex component	56.5844	53.9574	40.2499	31.4327	59.4259	31.7179	23.2714	29.6971	24.1584	64.5024	27.8002	34.5775	40.2889	62.3971	47.0711	26.7985	36.4101	53.0157	48.9417	17.6544	34.2756	13.6687	15.9196	36.8317	23.855	34.3074	41.1899	51.3993	25.7573	32.4156	14.3165	24.9667	31.0537	33.2641	14.1911	36.6975	42.2157	48.4989	53.3699	70.2976	45.9174	47.0838	59.5
CL	NUDT12	11	66514297	66531401	0.00181	nudix hydrolase 12	24.5402	27.2975	30.2478	38.2646	9.37163	52.2474	30.2639	23.8638	23.4004	11.8311	8.70454	9.74962	14.308	4.43117	9.1963	13.962	22.965	24.5911	23.2259	15.9772	23.4368	12.6435	22.0297	18.9388	9.6149	20.3505	15.0553	26.7562	23.3976	26.4644	26.2087	13.5985	12.0333	16.244	14.6073	28.7464	21.8188	28.3761	18.6409	19.5374	17.1358	10.9862	17.4507
CL	TM9SF4	4	14792499	14845549	0.00207	transmembrane 9 superfamily member 4	39.4959	29.6357	17.3376	34.2061	22.6863	39.8456	23.3379	35.085	36.6542	37.6151	36.0105	28.6376	36.603	26.4359	23.1171	28.6565	27.0856	23.9549	31.1081	60.1132	51.0901	40.4455	53.0653	46.6436	46.6034	47.6249	25.3612	31.6867	27.5603	25.2177	38.5495	39.1811	52.9233	42.3425	48.2496	43.4588	37.8978	41.1645	19.4447	34.227	28.8614	25.7677	27.4013
CL	PLA2G10	6	7711122	7864362	0.00231	phospholipase A2 group X	13.9285	18.8033	11.0687	16.6408	8.43206	19.3083	25.8645	18.0304	19.71	18.1059	16.47	15.4364	17.1282	9.74954	21.7922	13.8459	7.99246	15.9047	20.6071	18.9785	13.8137	19.1361	13.3876	11.0495	13.9154	16.374	20.1746	16.4192	24.511	15.2935	10.4987	14.1478	6.98709	16.6321	8.51463	18.9048	7.77657	17.0172	10.3268	10.8762	8.6511	14.2678	12.5263
CL	GSPT1	6	5306267	5339759	0.0029	G1 to S phase transition 1	36.214	40.4272	44.9188	30.5174	69.9781	41.7567	35.6384	31.0759	31.9058	40.6309	41.6014	55.4413	51.9182	36.6046	45.4934	42.7972	39.9712	40.8221	32.7996	19.0667	18.2307	27.7474	28.7765	25.4875	34.5831	29.7538	43.9135	47.3635	30.7093	34.0696	36.507	32.1155	38.3436	39.5081	23.4247	24.6874	31.6617	27.0573	54.881	70.0655	48.546	62.8926	59.727
CL	YLPM1	20	29933426	30016412	0.00303	YLP motif containing 1	26.1159	36.7891	25.1562	29.5837	32.1221	29.3391	24.3795	18.0304	20.8262	38.4751	29.6535	29.6378	30.4889	37.0483	31.3807	20.5455	23.9774	39.9657	22.3243	17.6544	18.7546	22.5533	19.71	15.4693	35.1199	24.9508	26.0589	40.9291	26.5882	28.2597	25.7697	24.1345	27.9484	34.6501	24.5978	33.3614	22.9594	21.2715	40.5097	33.8224	33.9389	39.2365	24.2697
CL	EFHC1	12	113757360	113841025	0.00327	EF-hand domain containing 1	0	4.08768	2.51562	0.92449	4.01527	0	4.43264	0	3.3322	3.39486	1.54445	2.46982	1.08889	2.43738	2.17922	1.78657	1.33208	1.63125	0	7.06176	6.14374	1.36687	2.27423	2.2099	2.65056	3.89856	0	3.33144	0.83088	1.66234	0	11.6511	3.88172	1.73251	7.56856	2.22409	0.740626	4.25429	0.643011	1.98955	1.99641	0.948811	1.76151
CL	MRPL10	19	37044536	37051602	0.0034	mitochondrial ribosomal protein L10	8.41801	30.9274	31.8678	40.6776	46.039	62.7063	54.6655	86.8853	63.3618	38.4751	52.5114	57.0652	40.0602	22.5458	46.2692	42.3595	61.5686	22.6336	40.6388	42.7943	44.9463	56.3832	54.7709	55.5569	46.2191	49.4494	29.2785	29.5832	33.3765	45.7808	49.2296	43.6252	43.1492	34.865	43.6801	45.5049	52.2585	45.3763	42.5995	49.1884	49.6307	35.7695	50.6298
CL	KLHL7	10	5228658	5294473	0.00364	kelch like family member 7	24.5837	23.0872	29.0403	18.6007	14.4871	17.4924	10.6383	30.7577	31.0228	12.8779	18.1257	10.5523	19.3931	18.0318	23.3351	23.1539	15.3278	17.014	30.9278	20.4614	37.0953	22.027	19.0656	22.703	9.49562	24.1633	24.0919	22.5205	11.275	19.9813	19.3177	19.0579	16.7923	25.946	29.7634	24.643	24.6184	16.0812	14.9179	9.3708	14.7801	11.5427	24.5516
CL	CENPW	12	40013265	40022364	0.00376	centromere protein W	8.70529	8.17536	8.04997	0.92449	7.22748	3.17179	7.75712	3.18184	2.49915	2.26324	9.8845	8.64437	5.98889	14.6243	5.23012	2.67985	0.888051	0.815626	6.86902	20.3026	13.5809	15.7189	9.0969	20.6257	21.2045	17.1537	9.24671	6.18696	9.97056	4.15584	1.90886	6.65779	5.4344	6.93003	7.56856	12.2325	13.3313	1.70172	6.43011	1.98955	5.98922	3.56696	3.91447
CL	LOC100342649	15	93912063	93913741	0.00401	UTP--glucose-1-phosphate uridylyltransferase-like	13.9285	26.1612	14.5906	32.3572	21.6824	45.991	40.4478	27.5759	19.1601	32.817	16.6801	16.6713	20.4167	20.9615	25.7148	35.2847	32.4139	52.2001	16.7432	17.213	23.9283	19.4778	26.1536	20.2574	22.8611	17.9334	42.0305	25.2237	29.9117	35.3247	25.2924	10.4028	10.8688	16.9786	15.1371	18.9048	16.2938	21.6969	38.9022	39.4595	54.5685	50.2941	49.3223
CL	SWAP70	1	165288933	165390524	0.0044	switching B cell complex subunit SWAP70	25.2453	17.9858	21.1312	36.0551	28.1069	28.5461	24.3795	25.4547	16.661	21.5008	25.329	24.6982	21.7778	28.7611	20.0488	40.1978	29.3057	30.9938	32.6278	26.4816	29.7486	28.0207	25.0165	24.3089	22.5297	31.1885	12.6092	28.5552	35.7278	19.1169	22.9064	27.4634	22.514	21.4831	28.3821	21.1289	27.4031	23.824	27.6495	31.8329	34.6044	22.1151	32.0987
CL	IGFBP7	15	88804993	88869486	0.00445	insulin like growth factor binding protein 7	92.9725	76.4887	78.2457	25.7008	99.7392	29.8941	53.4798	49.8912	32.0724	113.988	97.2388	138.705	103.826	182.287	69.3514	63.2981	68.6996	63.5046	75.9885	40.7817	68.5124	71.2137	56.6737	73.8549	56.099	52.2875	38.8866	63.6781	102.664	102.849	43.4839	76.9807	58.0239	62.6751	57.8049	57.6707	69.8114	31.5668	85.1089	86.5059	93.8711	70.8113	64.4792
[truncated: 72 more columns]
